# Supplementary material for: Evaluation of NEUROG1 methylation status in stool specimens in the advanced adenomas and colorectal cancer
Source: PeerJ. 2025 Oct 8;13:e19968. doi: 10.7717/peerj.19968 (PMC12514994; doi:10.7717/peerj.19968)
Supplement: Supplemental Information 1 [file peerj-13-19968-s001.xlsx]

## Sheet: Sheet1
NO.	TYPE		GENDER	AGE	PHASE		Marker3(CT value)	ACTB(CT value)	M3A Y	M3A E	M3A
1	AA	1	2	71			47.58	28.59	0.44992	0.61062	negetive
3	AA	1	1	63			34.52	25.3	2.03916	0.884848	positive
4	CRC	1	1	54	I	T1N0M0	50	31.24	-0.04452	0.488872	negetive
5	AA	1	1	59			50	27.42	0.32984	0.58172	negetive
6	NAA	0	1	74			50	27.41	0.33082	0.581959	negetive
7	AA	1	1	64			50	27.18	0.35336	0.587432	negetive
8	AA	1	2	68			30.52	26.43	2.31642	0.910228	positive
9	healthy	0	2	47			50	26.91	0.37982	0.59383	negetive
10	NAA	0	1	50			42.63	27.05	1.08099	0.746681	negetive
11	CRC	1	1	63	IV	T4N2M1	39.25	28.93	1.22461	0.772874	positive
12	CRC	1	2	47	III	pT3N2aM0 IIIB	50	26.92	0.37884	0.593593	negetive
13	AA	1	2	70			39.37	24	1.69611	0.845026	positive
15	NAA	0	1	63			50	30.47	0.03094	0.507734	negetive
16	CRC	1	1	68	III	ypT3N1cM0 IIIB	46.28	29.59	0.47802	0.61728	negetive
17	CRC	1	1	56	III	pT3N2aM0 IIIB	32.52	22.98	2.46052	0.921327	positive
18	healthy	0	1	73			34.34	24.86	2.09974	0.890878	positive
19	AA	1	1	36			50	29.55	0.1211	0.530238	negetive
22	AA	1	1	64			32.93	28.47	1.88273	0.867924	positive
23	CRC	1	2	41	IV	pT3N1bM1b IVB	39.99	29.67	1.08031	0.746553	negetive
24	CRC	1	1	58	II	pT4aN0M0 IIB	50	23.99	0.66598	0.660602	negetive
26	NAA	0	1	78			38.82	31.31	1.03308	0.737513	negetive
27	AA	1	2	64			37.51	26.26	1.65505	0.839572	positive
28	AA	1	2	72			37.69	26	1.66307	0.84065	positive
29	AA	1	1	59			32.01	25.28	2.28459	0.907593	positive
30	AA	1	1	57			37.31	29.93	1.31479	0.788314	positive
31	CRC	1	1	47	I	T1N0M0	39.39	27.72	1.32961	0.790776	positive
32	AA	1	1	56			39.77	26.93	1.37017	0.797408	positive
33	AA	1	2	57			42.6	28.73	0.91926	0.714891	negetive
34	AA	1	1	62			38.65	29.9	1.18775	0.766338	negetive
35	CRC	1	1	49	IV	pT4aN2M1 IV	26.79	22.88	3.02613	0.953741	positive
36	AA	1	1	59			50	26.65	0.4053	0.59996	negetive
38	NAA	0	1	54			50	27.45	0.3269	0.581005	negetive
40	NAA	0	1	64			37.72	26.04	1.65624	0.839733	positive
41	AA	1	2	69			40.46	29.25	1.07588	0.745714	negetive
42	CRC	1	1	34	II	pT3N0M0	50	26.1	0.4592	0.612824	negetive
43	CRC	1	1	39	II	ypT3N0M0 IIA	50	26.54	0.41608	0.602545	negetive
44	CRC	1	1	54	III	PT3N1M0 IIIB	50	25.64	0.50428	0.623465	negetive
45	CRC	1	2	67	III	pT3N1cM0,IIIB	47.6	24.39	0.85958	0.702573	negetive
46	CRC	1	1	74	II	pT4aN0M0,IIB	37.21	23.17	1.98697	0.879422	positive
48	AA	1	2	56			50	26.12	0.45724	0.612359	negetive
50	NAA	0	1	44			50	27.72	0.30044	0.57455	negetive
51	CRC	1	2	80	I	PT1N0M0	42.11	22.89	1.53911	0.823335	positive
53	AA	1	1	54			33.13	27.7	1.93879	0.874219	positive
54	CRC	1	2	68	I	PT1N0M0 IA	50	26.48	0.42196	0.603952	negetive
55	AA	1	2	45			50	27.27	0.34454	0.585293	negetive
56	AA	1	1	68			41.47	27.11	1.18763	0.766317	negetive
59	CRC	1	1	37	I	PT1N0M0	50	27.75	0.2975	0.573831	negetive
61	CRC	1	1	68	II	pT4aN0M0 IIB	39.9	22.56	1.78582	0.856414	positive
62	CRC	1	2	42	II	PT3N0M0 IIa	43.95	25.27	1.12739	0.755357	negetive
63	AA	1	1	51			36.8	25.89	1.76018	0.853232	positive
66	CRC	1	2	73	III	pT4aN1M0 IIIB	35.95	27.6	1.67505	0.842248	positive
67	healthy	0	1	45			50	30.27	0.05054	0.512632	negetive
68	CRC	1	1	81	II	PT3N0N0,IIA	27.12	23.08	2.97452	0.95141	positive
69	healthy	0	2	60			50	29.78	0.09856	0.52462	negetive
70	NAA	0	1	53			50	30.83	-0.00434	0.498915	negetive
71	AA	1	1	67			41.23	25.87	1.33243	0.791242	positive
72	AA	1	1	51			44.67	26.46	0.94093	0.719287	negetive
73	NAA	0	1	81			50	29.97	0.07994	0.519974	negetive
74	CRC	1	2	50	I	I	50	27.25	0.3465	0.585769	negetive
78	AA	1	1	57			34.98	28.7	1.66134	0.840418	positive
79	CRC	1	2	35	IV	cTxN+M1 IV	50	26.73	0.39746	0.598077	negetive
80	CRC	1	2	73	III	pT3N1aM0 IIIB	30.32	25.08	2.46812	0.921876	positive
81	CRC	1	2	49	I	PT2N0M0 I	50	22.91	0.77182	0.683914	negetive
82	CRC	1	2	73	II	PT4aN0M0 IIB	33.15	22.28	2.46801	0.921869	positive
83	AA	1	2	71			50	30.26	0.05152	0.512877	negetive
85	NAA	0	2	62			36.36	27.93	1.60294	0.832429	positive
86	AA	1	1	63			50	28.44	0.22988	0.557218	negetive
87	NAA	0	1	59			43.56	26.14	1.07996	0.746486	negetive
88	AA	1	1	66			50	28.79	0.19558	0.54874	negetive
89	AA	1	1	59			35.71	26.59	1.79731	0.857821	positive
90	AA	1	1	59			39.46	28.43	1.25324	0.77786	positive
91	CRC	1	1	61	III	PT3N2aM0 IIIB	28.94	25.34	2.5765	0.929334	positive
92	CRC	1	1	58	I	T1N0M0 I	50	30.56	0.02212	0.50553	negetive
93	AA	1	2	27			45.34	26.85	0.83772	0.697985	negetive
94	AA	1	2	30			37.43	27.33	1.55795	0.826059	positive
95	CRC	1	1	24	IV	IV B	50	30.42	0.03584	0.508959	negetive
96	CRC	1	1	54	IV	PT3N0M1 IV	50	24.86	0.58072	0.641233	negetive
97	AA	1	1	44			32.99	31.17	1.61231	0.833732	positive
98	AA	1	2	50			33.47	26.9	1.98421	0.879129	positive
99	AA	1	2	64			50	29.67	0.10934	0.527308	negetive
101	CRC	1	1	57	IV	IV	50	26.43	0.42686	0.605124	negetive
102	CRC	1	1	66	III	ypT4bN1M0 IIIC	31.78	24.62	2.37158	0.914634	positive
104	AA	1	1	60			50	25.95	0.4739	0.616306	negetive
105	CRC	1	1	70	III	pT3N1M0 IIIB	31.37	24.97	2.37705	0.91506	positive
106	AA	1	2	56			34.76	32.81	1.2799	0.782433	positive
107	CRC	1	2	69	I	PT1NOMO I	36.45	29.73	1.41781	0.804995	positive
108	AA	1	2	76			34.91	30.71	1.47115	0.813232	positive
109	CRC	1	2	77	II	PT3N0M0,IIA	36.88	26.95	1.64854	0.838694	positive
110	CRC	1	2	72	II	ypT3N0M0 IIA	32.16	29.39	1.86726	0.866141	positive
111	NAA	0	2	59			39.25	27.53	1.36181	0.796054	positive
112	AA	1	2	66			50	31.77	-0.09646	0.475904	negetive
113	CRC	1	2	61	IV	ypT4bN1cM1a IVA	50	25.93	0.47586	0.61677	negetive
114	CRC	1	2	38	I	T1N0M0 I	50	25.94	0.47488	0.616538	negetive
115	AA	1	2	55			39.33	29.55	1.15609	0.760622	negetive
117	healthy	0	2	57			50	21.84	0.87668	0.706134	negetive
121	CRC	1	1	56	III	Pt4n1cm0 IIIB	50	27.99	0.27398	0.56807	negetive
123	AA	1	1	66			29.99	26.83	2.32863	0.911221	positive
124	AA	1	1	76			50	23.7	0.6944	0.666945	negetive
126	CRC	1	1	49	IV	IV	50	27.24	0.34748	0.586006	negetive
127	AA	1	2	61			50	28.29	0.24458	0.560842	negetive
129	CRC	1	1	56	I	PT1N0M0 I	33.64	28.37	1.82366	0.861005	positive
130	AA	1	1	51			33.78	28.46	1.80126	0.858302	positive
131	CRC	1	1	52	0		31.38	23.89	2.48192	0.922865	positive
132	AA	1	2	81			33.68	31.88	1.4758	0.813937	positive
133	CRC	1	1	65	III	PT3N2aM0 IIIB	32.8	29.57	1.78754	0.856625	positive
134	CRC	1	1	70	II	PT3N0M0 IIA	35.08	26.73	1.8447	0.863504	positive
137	AA	1	2	59			50	30.25	0.0525	0.513122	negetive
138	AA	1	1	54			37.62	29.34	1.34254	0.792907	positive
139	NAA	0	2	50			50	31.08	-0.02884	0.49279	negetive
141	AA	1	1	52			50	29.43	0.13286	0.533166	negetive
142	AA	1	2	68			50	27.43	0.32886	0.581482	negetive
143	CRC	1	2	56	II	ypT4aN0M0 IIB	35.68	31.26	1.34256	0.792911	positive
144	CRC	1	2	41	II	Pt3n0m0,IIA	37.35	25.99	1.69703	0.845146	positive
147	CRC	1	1	65	IV	PT3N0M1b,IVB	30.13	26.21	2.37581	0.914964	positive
148	AA	1	2	60			36.75	29.39	1.42203	0.805656	positive
149	NAA	0	2	65			50	29.39	0.13678	0.534142	negetive
150	CRC	1	1	65	III	pT3N2bM0 IIIC	34.9	23.99	2.13068	0.89385	positive
151	AA	1	1	45			50	27.95	0.2779	0.569031	negetive
153	CRC	1	1	69	IV	cT4aN+M1b,Ivb	50	28.38	0.23576	0.558669	negetive
154	CRC	1	1	51	II	pT4aN0M0 IIB	36.2	27.876	1.62375	0.835312	positive
155	CRC	1	2	67	III	T2N1M0 IIIA	35.46	24.864	1.99071	0.879818	positive
157	CRC	1	2	34	I	pT1N0M0,I	39.33	26.544	1.45068	0.810103	positive
158	AA	1	1	83			33.63	29.518	1.71213	0.847112	positive
160	CRC	1	2	66	I	ypT1N0M0,I	36.85	29.108	1.43997	0.808449	positive
162	CRC	1	1	57	III	III	39.9	25.026	1.54415	0.824067	positive
163	CRC	1	1	77	III	Pt3n1m0 IIIB	50	29.216	0.153832	0.538382	negetive
164	AA	1	2	65			38.88	30.154	1.14055	0.75778	negetive
165	CRC	1	2	52	IV	Pt3n3m1,IV	41.02	24.644	1.47295	0.813505	positive
166	AA	1	1	27			34.92	28.998	1.63796	0.837257	positive
168W	CRC	1	1	78	0		37.98	26.548	1.58124	0.829379	positive
168L	CRC	1	1	68	III	ypT3N1cM0 IIIB	38.03	28.768	1.35883	0.795569	positive
169	CRC	1	1	82	I	pT2N0M0,IB	35.81	24.412	2.00105	0.880908	positive
170	CRC	1	1	68	II	pT4aN0M0 IIB	34.92	25.516	1.97919	0.878595	positive
171	CRC	1	1	66	III	Pt2n1mo IIIA	34.99	30.318	1.50181	0.817844	positive
172	CRC	1	1	58	0		37.85	28.444	1.40804	0.803456	positive
173	CRC	1	1	77	IV	cT4aN+M1a,IVA	37.29	25.138	1.78635	0.856479	positive
174	CRC	1	2	86	I	pT2N0M0,I	23.73	22.342	3.37567	0.966936	positive
175	AA	1	2	69			39.4	31.0967	0.997727	0.730611	negetive
176	CRC	1	2	43	III	pT3N2aM0,IIIB	39.41	24.1233	1.68014	0.842924	positive
177	AA	1	1	74			37.59	31.44	1.13965	0.757615	negetive
178	CRC	1	1	55	IV	cT3bN1M1a	29.16	21.9833	2.88411	0.947055	positive
180	AA	1	1	74			38.26	31.04	1.11386	0.752848	negetive
181	CRC	1	1	69	I	pT2N0M0,I	37.22	24.4633	1.85925	0.86521	positive
182	CRC	1	2	69	I	Pt2n0m0 I	37.93	23.8067	1.85474	0.864682	positive
186	CRC	1	1	81	I	pT2N0M0，I	36.73	30.2033	1.34426	0.79319	positive
188	CRC	1	2	51	I	Pt2n0m0 I	46.9	24	0.9657	0.724262	negetive
189	CRC	1	2	43	II	PT3N0M0 IIA	50	30.5733	0.0208133	0.505203	negetive
191	AA	1	1	41			50	29.54	0.12208	0.530482	negetive
192	CRC	1	1	51	III	ypT3N1bM0,IIIB	50	26.8	0.3906	0.596427	negetive
194	AA	1	1	68			50	30.84	-0.00532	0.49867	negetive
197	CRC	1	1	45	III	Pt3n1m0,IIIB	37.11	24.11	1.90455	0.870406	positive
198	CRC	1	2	66	III	pT3N1M0,IIIB	35.1	27.44	1.77318	0.854853	positive
199	AA	1	2	57			50	30.58	0.02016	0.50504	negetive
200	CRC	1	1	60	III	pT4AN1M0，IIIB	35.09	22.71	2.23769	0.903583	positive
201	CRC	1	1	48	IV	IV	50	25.63	0.50526	0.623695	negetive
203	CRC	1	2	46	I	PT1N0M0,I	36.23	24.98	1.90465	0.870417	positive
205	CRC	1	1	67	III	pT4aN1cM0 IIIB	50	28.6	0.2142	0.553346	negetive
207	CRC	1	2	57	II	pT3N0M0,IIA	38.51	26.39	1.54531	0.824235	positive
209	CRC	1	2	78	I	pT1N0M0,I	37.49	27.86	1.50019	0.817603	positive
212	healthy	0	2	57			50	24.46	0.61992	0.6502	negetive
213	CRC	1	2	64	II	PT3N0M0 IIB	38.14	21.24	2.0859	0.889525	positive
214	healthy	0	1	71			50	25.1	0.5572	0.635804	negetive
216	CRC	1	2	61	I	pT1N0M0，I	35.17	24.34	2.07019	0.887972	positive
217	AA	1	2	71			36.55	24.66	1.90497	0.870453	positive
219	AA	1	1	48			38.04	27.07	1.52426	0.821165	positive
218	AA	1	1	32			36.83	28.77	1.47503	0.813821	positive
220	AA	1	1	70			35.82	29.265	1.52449	0.821199	positive
221	CRC	1	1	62	II	pT3N0M0,IIA	50	26.4325	0.426615	0.605065	negetive
222	AA	1	1	69			39.8	25.5925	1.49833	0.817326	positive
223	CRC	1	1	70	II	T4bN0M0 IIc	50	29.28	0.14756	0.536823	negetive
224	NAA	0	1	55			37.36	28.3575	1.46404	0.812151	positive
225	CRC	1	2	54	IV	IV	35.87	21.79	2.25219	0.904839	positive
227	NAA	0	1	44			35.02	29.68	1.56142	0.826557	positive
228	AA	1	1	74			43.73	27.7225	0.908385	0.71267	negetive
229	NAA	0	1	48			34.93	27.675	1.76664	0.854039	positive
230	CRC	1	1	63	II	pT4bN0M0 IIC	50	23.0775	0.755405	0.680355	negetive
231	NAA	0	2	67			36.26	25.5125	1.84956	0.864075	positive
232	CRC	1	1	72	III	Pt3N2aM0,IIIB	31.84	26.69	2.1629	0.896868	positive
233	CRC	1	1	56	I	Pt2n0mo I	32.27	22.745	2.5078	0.924687	positive
234	healthy	0	2	29			39.09	25.7575	1.55103	0.825063	positive
235	CRC	1	2	45	0		37.4	28.54	1.44228	0.808807	positive
237	CRC	1	2	68	II	pT4aN0M0 IIB	36.53	27.1525	1.66264	0.840593	positive
238	CRC	1	1	34	III	PT4bN3MO,IIIc	32.75	25.1725	2.22334	0.902326	positive
239	healthy	0	2	83			50	26.8175	0.388885	0.596014	negetive
241	AA	1	1	67			36.73	31.4975	1.21744	0.771612	positive
242	AA	1	1	46			37.22	30.85	1.23336	0.774406	positive
243	NAA	0	1	58			50	30.595	0.01869	0.504672	negetive
244	AA	1	1	46			36.31	26.7625	1.7222	0.848413	positive
247	CRC	1	1	59	I	Pt2nomo I	38.28	25.1625	1.68791	0.84395	positive
248	AA	1	1	79			50	31.135	-0.03423	0.491443	negetive
251	NAA	0	2	56			50	27.635	0.30877	0.576585	negetive
252	AA	1	2	54			50	28.4675	0.227185	0.556553	negetive
253	AA	1	1	48			36.36	27.625	1.63283	0.836557	positive
DZ01	healthy	0	2	59			37.31	26.925	1.60928	0.833311	positive
196	CRC	1	2	30	I	ypT2N0M0 Ib	50	26.9483	0.376063	0.592923	negetive
245	AA	1	2	58			50	29.8633	0.0903933	0.522583	negetive
246	AA	1	2	56			37.54	26.58	1.62078	0.834903	positive
254	CRC	1	1	74	II	ypT3N0M0 IIA	37.92	25.8567	1.65481	0.83954	positive
255	AA	1	2	74			37.99	29.4817	1.29277	0.784615	positive
256	CRC	1	1	54	II	pT4aM0N0m0 IIB	50	22.3817	0.823597	0.694999	negetive
258	AA	1	2	59			40.45	30.6833	0.936383	0.718369	negetive
259	CRC	1	1	87	I	Pt2n0m0 I	29.61	26.3933	2.40828	0.917457	positive
261	AA	1	1	65			37.38	30.7367	1.22895	0.773634	positive
262	AA	1	1	33			50	30.565	0.02163	0.505407	negetive
263	NAA	0	1	40			50	30.2433	0.0531533	0.513285	negetive
265	AA	1	2	77			50	30.32	0.04564	0.511408	negetive
266	NAA	0	1	52			50	30.3333	0.0443333	0.511082	negetive
268	healthy	0	2	64			50	29.6917	0.107217	0.526779	negetive
269	healthy	0	1	58			50	28.3967	0.234127	0.558266	negetive
270	AA	1	2	31			36.38	28.5783	1.53746	0.823096	positive
271	AA	1	1	55			50	28.5017	0.223837	0.555727	negetive
272	NAA	0	1	54			50	29.2683	0.148703	0.537107	negetive
273	AA	1	1	52			50	30.6617	0.0121567	0.503039	negetive
275	healthy	0	1	65			41.74	30.34	0.8449	0.699496	negetive
276	AA	1	2	56			35.27	29.3633	1.5682	0.827527	positive
278	healthy	0	2	61			50	29.3367	0.142007	0.535442	negetive
279	AA	1	2	67			37.36	29.9983	1.30324	0.78638	positive
280	CRC	1	2	66	0		33.89	22.9917	2.32649	0.911047	positive
281	CRC	1	2	58	III	T4N2MO IIIC	37.6	25.4367	1.72701	0.849029	positive
282	NAA	0	1	81			34.44	25.5833	2.01915	0.882793	positive
284	AA	1	2	69			43.79	27.61	0.91359	0.713734	negetive
286	NAA	0	1	64			38.93	27.9	1.35659	0.795205	positive
288	NAA	0	1	66			39.51	26.87	1.40127	0.802385	positive
290	healthy	0	1	72			43.52	27.44	0.95644	0.722408	negetive
291	AA	1	1	47			32.19	29.09	1.89375	0.869183	positive
292	NAA	0	1	53			42.28	30.31	0.79546	0.689002	negetive
293	healthy	0	1	75			50	29.35	0.1407	0.535117	negetive
294	AA	1	2	65			35.19	28.19	1.69095	0.844349	positive
295	CRC	1	1	76	IV	IV	50	26.63	0.40726	0.600431	negetive
297	healthy	0	1	63			36.8	32.72	1.09084	0.74854	negetive
298	AA	1	1	52			50	27.74	0.29848	0.574071	negetive
299	AA	1	2	60			50	29.67	0.10934	0.527308	negetive
300	healthy	0	2	72			50	24.17	0.64834	0.656636	negetive
301	healthy	0	2	42			50	27.73	0.29946	0.574311	negetive
302	NAA	0	2	54			41.01	27.54	1.19011	0.766761	negetive
303	healthy	0	2	65			38.04	33.35	0.90882	0.712759	negetive
304	healthy	0	2	33			50	28.69	0.20538	0.551165	negetive
311	healthy	0	2	51			50	28.3	0.2436	0.560601	negetive
312	healthy	0	2	66			35.45	28.71	1.61477	0.834073	positive
315	CRC	1	2	64			43.5	21.96	1.49542	0.81689	positive
316	healthy	0	2	65			50	27.8	0.2926	0.572633	negetive
328	healthy	0	2	18			50	28.15	0.2583	0.564218	negetive
329	healthy	0	2	30			50	24.48	0.61796	0.649754	negetive
330	NAA	0	1	57			50	28.9	0.1848	0.546069	negetive
331	healthy	0	2	48			50	25.56	0.51212	0.625303	negetive
332	healthy	0	2	65			50	30.26	0.05152	0.512877	negetive
333	AA	1	2	43			50	27.37	0.33474	0.582912	negetive
334	NAA	0	2	42			50	23.22	0.74144	0.677311	negetive
335	healthy	0	2	46			50	29.75	0.1015	0.525353	negetive
336	NAA	0	1	44			50	28.42	0.23184	0.557702	negetive
337	healthy	0	1	60			50	29.96	0.08092	0.520219	negetive
338	NAA	0	1	57			38.86	27.07	1.44472	0.809185	positive
339	healthy	0	2	56			42.35	26.4	1.17185	0.763479	negetive
341	healthy	0	2	63			50	31.74	-0.09352	0.476637	negetive
342	AA	1	1	63			40.07	29.76	1.06373	0.743403	negetive
343	NAA	0	1	56			50	30.79	-0.00042	0.499895	negetive
344	healthy	0	1	57			50	28.99	0.17598	0.543882	negetive
345	healthy	0	2	53			50	24.75	0.5915	0.643709	negetive
346	NAA	0	1	52			50	29.6933	0.107053	0.526738	negetive
347	NAA	0	1	65			50	26.9883	0.372143	0.591977	negetive
348	NAA	0	1	64			38.91	26.3667	1.5088	0.818883	positive
349	AA	1	1	71			50	29.3383	0.141843	0.535401	negetive
350	NAA	0	2	69			50	24.9333	0.573533	0.639578	negetive
351	CRC	1	2	35			39.4	28.6067	1.24175	0.775868	positive
352	CRC	1	2	68			50	29.2567	0.149847	0.537392	negetive
353	NAA	0	2	55			50	28.715	0.20293	0.550559	negetive
354	CRC	1	2	46			50	24.1783	0.647523	0.656452	negetive
355	healthy	0	1	63			50	25.9383	0.475043	0.616577	negetive
356	NAA	0	2	51			40.52	28.38	1.15532	0.760481	negetive
357	CRC	1	1	72			27.99	23.47	2.85191	0.945417	positive
305	healthy	0	1	50			37.85	27.96	1.45547	0.810839	positive
310	healthy	0	1	41			39.6	26.43	1.43566	0.807782	positive
									8.135	0.999707	阳性
									8.135	0.999707	阳性
